# Supplementary material for: Polymerase η suppresses telomere defects induced by DNA damaging agents
Source: PubMed Central journal article supplement (PMC4245935; doi:10.1093/nar/gku1030), 2014-10-29

## Supplemental Figure Legends

**Figure S1. Viability test of Wt and XPV cells after UVC exposure or Cr(VI) exposure.** Cell viability was evaluated of SV40 immortalized XP30RO-derived cells expressing pol $\eta$  (Wt) or vector alone (XPV) prior to cell cycle profiling with LIVE/DEAD® Fixable Dead Cell Staining Kit. Cells were (A) irradiated with 0, 5, or 10 J/m<sup>2</sup> UVC or (B) exposed to 0, 1, or 3  $\mu$ M Cr(VI) for 48 h and then recovery in fresh media for 48 h.

**Figure S2. UVC induces polymerase  $\eta$  localization to telomeres in U2OS cells.** (A) Confocal images of EGFP-Pol $\eta$  U2OS cells exposed to UVC and recovered for 6 h. Cells were analyzed via IF-FISH of pol $\eta$  (green) and telomere (red) co-localization (yellow). (B) Average pol $\eta$  foci and co-localized pol $\eta$  and telomere foci per cell after indicated UVC dose. The data represent mean  $\pm$  SE from two individual experiments and a minimum of 100 interphase cells. Bars with a symbol of \* indicates a significant difference compared to mock exposure and between the different concentrations, black bars refer to Pol $\eta$  foci, red bars refer to Pol $\eta$  + Telomeres ( $p < 0.05$ ). Bars, 10  $\mu$ M.

**Figure S3. UVC and Cr(VI) induce 53BP1 foci formation.** SV40 immortalized XP30RO-derived cells expressing pol $\eta$  (Wt) or vector alone (XPV) following irradiation with 5 J/m<sup>2</sup> UVC and recovered for six hours or exposure to 3  $\mu$ M Cr(VI) for 48 h. Cells were analyzed via IF-FISH for 53BP1 at 0 or 6 hours recovery for average 53BP1 foci per cell after UVC (A) or Cr(VI) (B). Data represent averages from two individual experiments and a minimum of 50 cells. Bars with a symbol of \* indicates a significant difference compared to mock exposure and between the two concentrations ( $p < 0.05$ ). Bars, 10  $\mu$ M. Untreated, UT.

**Figure S4. UVC induces telomere aberrations in BJ and GM02359 cells.** (A) BJ and (B) XPV (GM02359) primary fibroblasts exposed to 0 or 5 J/m<sup>2</sup> UVC, recovered for 6 h, and incubated for 10 h with colcemid. Analysis of telomere defects per metaphase was evaluated using telomere FISH. Bars with \* are significantly different ( $p < 0.05$ ). The data represent mean  $\pm$  SE from an average of two to three independent experiments and 75 metaphases. Telomere signal free ends, SFE.

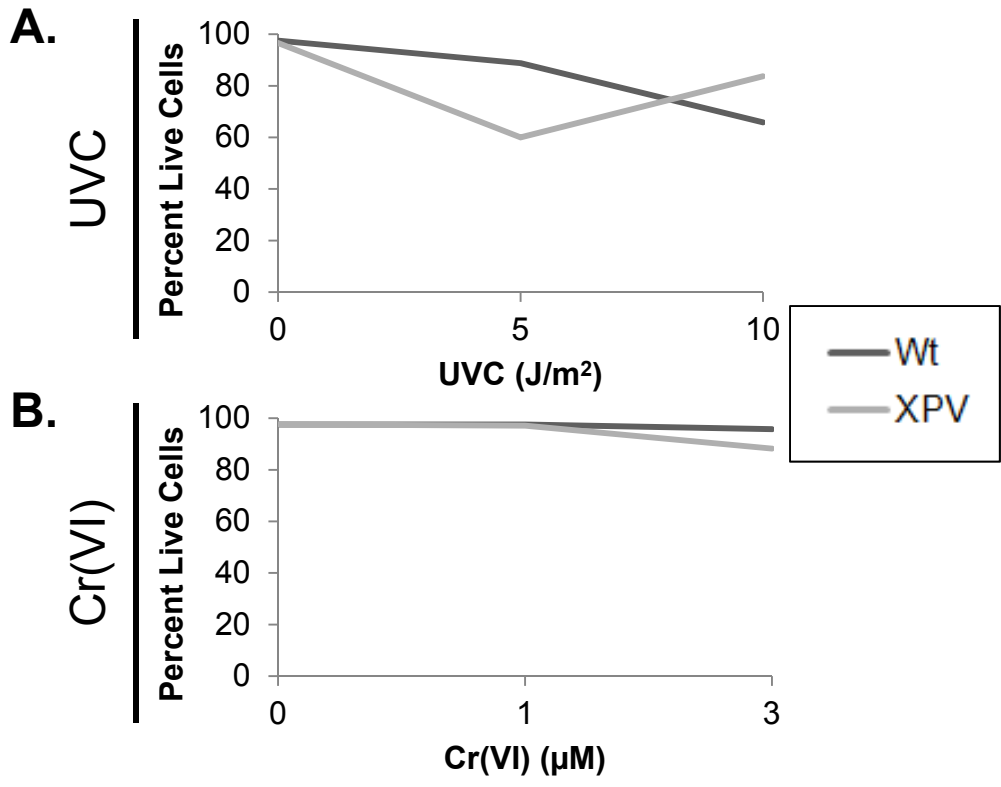

Figure S1

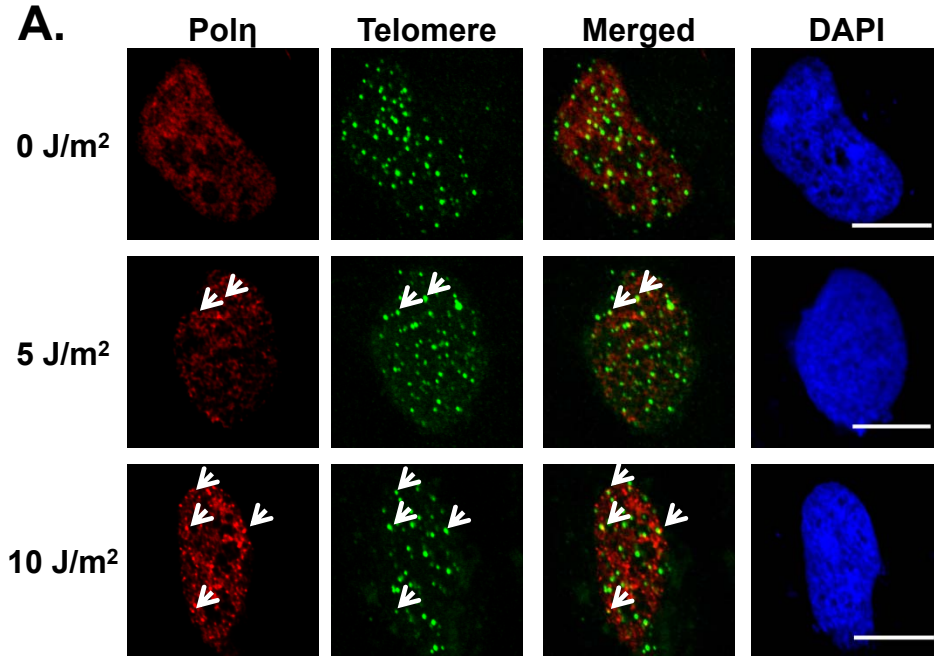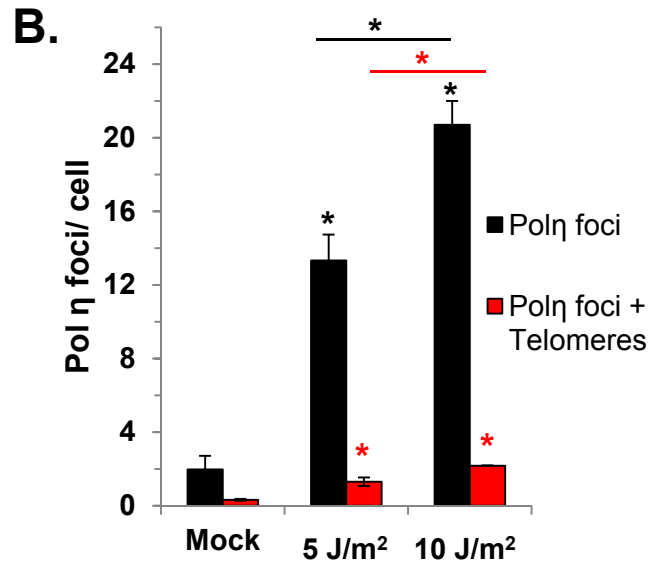

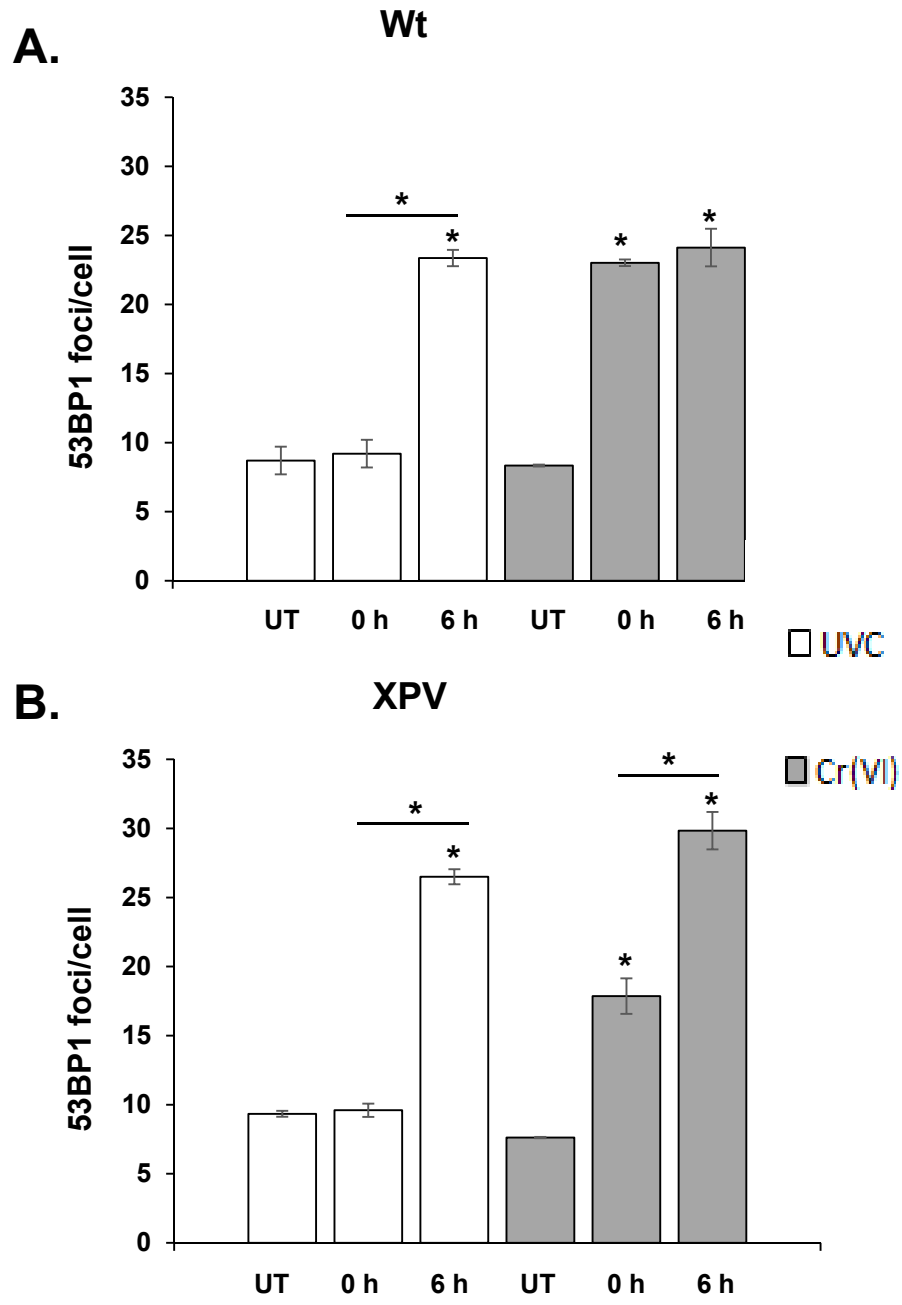

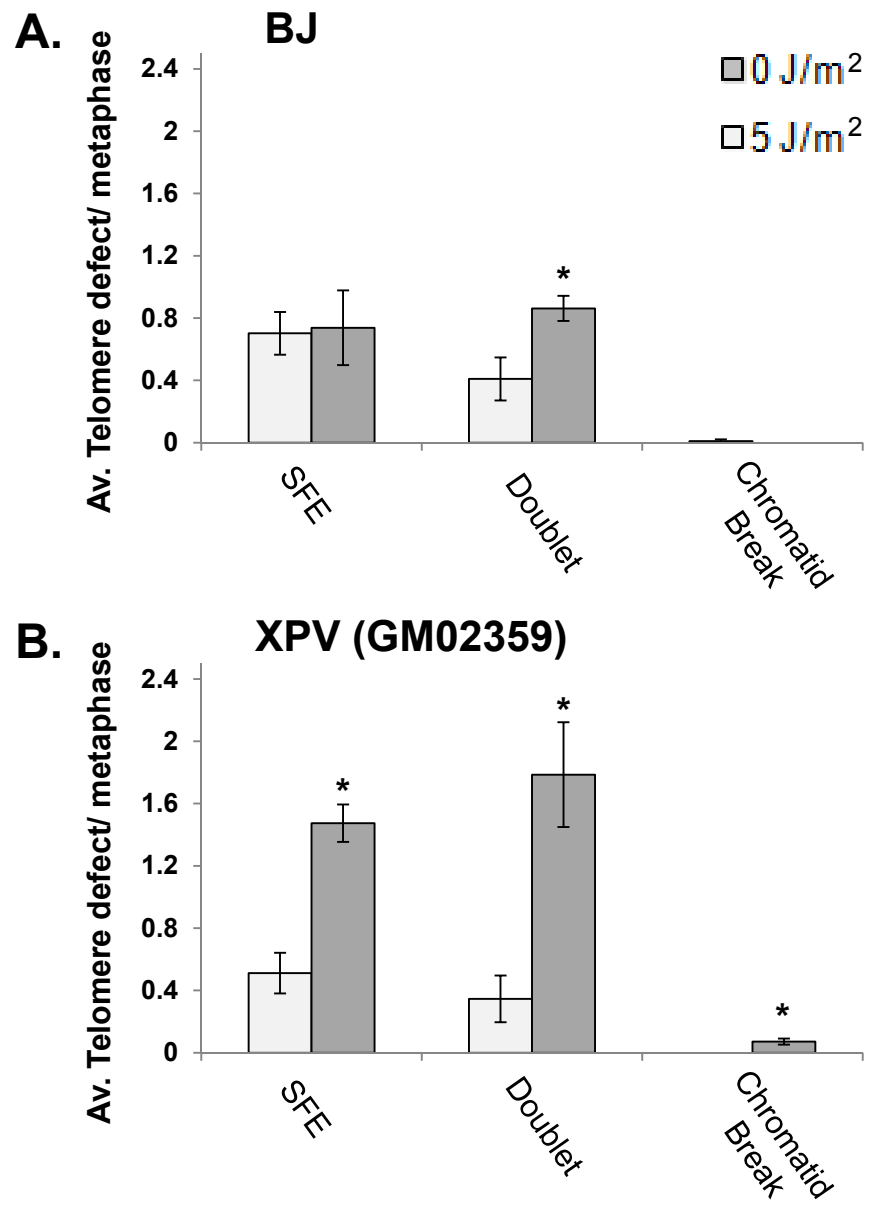

Supplement: supp_gku1030_nar-02617-d-2014-File008.pdf [file supp_gku1030_nar-02617-d-2014-File008.pdf]
